# Supplementary material
Source: PubMed Central journal article supplement (PMC9208259)
Supplement: 134_2022_6684_MOESM2_ESM.pdf [file 134_2022_6684_MOESM2_ESM.pdf]

|                                                      |     |                                                                                                                                                   |                   |
|------------------------------------------------------|-----|---------------------------------------------------------------------------------------------------------------------------------------------------|-------------------|
|                                                      |     | interventions                                                                                                                                     | appendix          |
| Blinding                                             | 11a | If done, who was blinded after assignment to interventions (for example, participants, care providers, those assessing outcomes) and how          | Suppl. appendix   |
|                                                      | 11b | If relevant, description of the similarity of interventions                                                                                       |                   |
| Statistical methods                                  | 12a | Statistical methods used to compare groups for primary and secondary outcomes                                                                     | 7,8               |
|                                                      | 12b | Methods for additional analyses, such as subgroup analyses and adjusted analyses                                                                  | 7,8               |
| <b>Results</b>                                       |     |                                                                                                                                                   |                   |
| Participant flow (a diagram is strongly recommended) | 13a | For each group, the numbers of participants who were randomly assigned, received intended treatment, and were analysed for the primary outcome    |                   |
|                                                      | 13b | For each group, losses and exclusions after randomisation, together with reasons                                                                  | Figure 1          |
| Recruitment                                          | 14a | Dates defining the periods of recruitment and follow-up                                                                                           | 7                 |
|                                                      | 14b | Why the trial ended or was stopped                                                                                                                | 7                 |
| Baseline data                                        | 15  | A table showing baseline demographic and clinical characteristics for each group                                                                  | Table 1           |
| Numbers analysed                                     | 16  | For each group, number of participants (denominator) included in each analysis and whether the analysis was by original assigned groups           | Table 1           |
| Outcomes and estimation                              | 17a | For each primary and secondary outcome, results for each group, and the estimated effect size and its precision (such as 95% confidence interval) | Table 2           |
|                                                      | 17b | For binary outcomes, presentation of both absolute and relative effect sizes is recommended                                                       |                   |
| Ancillary analyses                                   | 18  | Results of any other analyses performed, including subgroup analyses and adjusted analyses, distinguishing pre-specified from exploratory         | Tables S1-S18     |
| Harms                                                | 19  | All important harms or unintended effects in each group (for specific guidance see CONSORT for harms)                                             | Tables S9 and S10 |
| <b>Discussion</b>                                    |     |                                                                                                                                                   |                   |
| Limitations                                          | 20  | Trial limitations, addressing sources of potential bias, imprecision, and, if relevant, multiplicity of analyses                                  | 13                |
| Generalisability                                     | 21  | Generalisability (external validity, applicability) of the trial findings                                                                         | 13                |
| Interpretation                                       | 22  | Interpretation consistent with results, balancing benefits and harms, and considering other relevant evidence                                     | 11                |
| <b>Other information</b>                             |     |                                                                                                                                                   |                   |
| Registration                                         | 23  | Registration number and name of trial registry                                                                                                    | 1                 |
| Protocol                                             | 24  | Where the full trial protocol can be accessed, if available                                                                                       | Suppl. Appendix   |
| Funding                                              | 25  | Sources of funding and other support (such as supply of drugs), role of funders                                                                   | 1                 |
